# Supplementary material for: Emergence of Spatial Structure in Cell Groups and the Evolution of Cooperation
Source: PLOS journal article supplement (doi:10.1371/journal.pcbi.1000716), 2010-03-18
Supplement: S5 (10.1371/journal.pcbi.1000716.s005) [file journal.pcbi.1000716.s005]

**Table S1. List of parameters used in our simulation models and subsequent analyses.**

| <b>Symbol</b>                                                                                                                                                            | <b>Description</b>                                                                              | <b>Dimensions</b>     |
|--------------------------------------------------------------------------------------------------------------------------------------------------------------------------|-------------------------------------------------------------------------------------------------|-----------------------|
| $\delta$                                                                                                                                                                 | Active layer depth parameter                                                                    | <i>dimensionless</i>  |
| $\mu_{max}$                                                                                                                                                              | Maximum cell growth rate                                                                        | $T^{-1}$              |
| $\rho$                                                                                                                                                                   | Density of cell biomass                                                                         | $M_X L^{-3}$          |
| $\tau$                                                                                                                                                                   | Threshold extracellular enzyme concentration                                                    | $M_E L^{-3}$          |
| $B$                                                                                                                                                                      | Fold increase in growth rate due to presence of extracellular enzyme at threshold concentration | <i>dimensionless</i>  |
| $C$                                                                                                                                                                      | Fold decrease in growth rate due to production of extracellular enzyme                          | <i>dimensionless</i>  |
| $D_G$                                                                                                                                                                    | Growth substrate diffusivity                                                                    | $L^2 T^{-1}$          |
| $D_E$                                                                                                                                                                    | Extracellular enzyme diffusivity                                                                | $L^2 T^{-1}$          |
| $[E]$                                                                                                                                                                    | Local concentration of extracellular enzyme                                                     | $M_E L^{-3}$          |
| $[G]$                                                                                                                                                                    | Local concentration of growth substrate                                                         | $M_G L^{-3}$          |
| $G_{bulk}$                                                                                                                                                               | Bulk growth substrate concentration                                                             | $M_G L^{-3}$          |
| $h$                                                                                                                                                                      | Height of boundary layer                                                                        | $L$                   |
| $I_{S1 \rightarrow S2}$                                                                                                                                                  | Fitness at invasion of strain S1 (rare mutant) into strain S2 (majority resident)               | <i>dimensionless</i>  |
| $K_G$                                                                                                                                                                    | Half-saturation constant for growth substrate concentration                                     | $M_G L^{-3}$          |
| $N_{S,t}$                                                                                                                                                                | Number of individuals of strain S in a cell group at time $t$                                   | <i>dimensionless</i>  |
| $R_E$                                                                                                                                                                    | Rate of extracellular enzyme production by cooperative cells                                    | $M_E M_X^{-1} T^{-1}$ |
| $w_S$                                                                                                                                                                    | Fitness of strain S                                                                             | $T^{-1}$              |
| $X_{red}$                                                                                                                                                                | Concentration of red cell biomass (neutral simulations only)                                    | $M_X L^{-3}$          |
| $X_{blue}$                                                                                                                                                               | Concentration of blue cell biomass (neutral simulations only)                                   | $M_X L^{-3}$          |
| $X_{E-}$                                                                                                                                                                 | Concentration of exploitative (growth-only) cell type biomass                                   | $M_X L^{-3}$          |
| $X_{E+}$                                                                                                                                                                 | Concentration of cooperative (enzyme-producing) cell type biomass                               | $M_X L^{-3}$          |
| $Y$                                                                                                                                                                      | Yield of biomass on substrate                                                                   | $M_X M_G^{-1}$        |
| $M_E$ represents mass of extracellular enzyme, $M_G$ represents mass of growth substrate, $M_X$ represents cell biomass, $L$ represents length, and $T$ represents time. |                                                                                                 |                       |
